# Supplementary material
Source: Elsevier journal article supplement (https://www.sciencedirect.com/science/article/pii/S2007078017300111)
Supplement: mmc1 [file S2007078017300111:mmc1.doc]

**Supplementary material**

*Supplementary Material 1: Psychometric Data*

| Supplementary Table 1  *Satisfaction With Life Scale: Scores’ Reliability* | | |
| --- | --- | --- |
| Reliability | China | Spain |
| ω | .79 | .74 |
| *Notes*. Reliability was computed by using McDonald’s Omega; R software and *psych* package were used. | | |

| Supplementary Table 2  *Questionnaire about attitudes and emotions concerning literature studied in class: Psychometric properties* | | | |
| --- | --- | --- | --- |
| Item | g | F1 | F2 |
| Calling | .44 |  | .60 |
| Open-mindedness | .55 |  | .44 |
| Integration | .41 |  | .46 |
| Questions about China | .34 |  | .30 |
| Personal values | .60 | .67 |  |
| Understanding | .30 |  | .32 |
| Opinion | .42 | .38 |  |
| Remember | .38 |  | .36 |
| Talk with friends | .48 |  | .50 |
| Believe in yourself | .43 |  | .36 |
| Questions about yourself | .48 |  | .30 |
| Questions about Spain | .54 | .36 |  |
| Madurate | .60 | .42 |  |
| Better professor | - | - | - |
| Pride | .32 |  | .24 |
| % Variance | 51 | | |
| ω | .88 | .81 | .82 |
| *Notes*. g: general factor; Reliability was computed by using McDonald’s Omega (ω); Factor Analysis was computed by using a bi-factor model. R software and *psych* package were used. In the present study, the “g factor” scores were used. Item 14 had a factor loading <.30. | | | |

| Supplementary Table 3  *UWES-9: Scores’ Reliability* | | |  |
| --- | --- | --- | --- |
| Scale | China | Spain | |
| Vigor | .84 | .65 | |
| Dedication | .72 | .79 | |
| Absorption | .73 | .73 | |
| Engagement | .89 | .86 | |
| *Notes*. Reliability was computed by using McDonald’s Omega ; R software and *psych* package were used | | | |

| Supplementary Table 4  *Aesthetic experience/aesthetic pleasure while reading a literary work: Psychometric properties* | | |
| --- | --- | --- |
| Item | China | Spain |
| 1 | .49 | .49 |
| 2 | .63 | .78 |
| 3 | .69 | .75 |
| 4 | .55 | .54 |
| 5 | .53 | .59 |
| 6 | .76 | .71 |
| 7 | .71 | .83 |
| 8 | .41 | .42 |
| 9 | .68 | .54 |
| 10 | .61 | .64 |
| % Variance | 87 | 90 |
| ω | .86 | .87 |
| *Notes*. Reliability was computed by using McDonald’s Omega (ω); Exploratory Factor Analysis is based on polychoric correlations forcing the solution to be one-dimensional. R software and *psych* package were used. | | |

| Supplementary Table 5  *Ryff’s well-being scale: Scores’ Reliability* | | |  |
| --- | --- | --- | --- |
| Scale | China | Spain | |
| Self-acceptance | .74 | .77 | |
| Positive relationships | .79 | .78 | |
| Purpose in life | .79 | .68 | |
| Autonomy | .68 | .64 | |
| Environmental mastery | .70 | .68 | |
| Personal growth | .70 | .62 | |
| Psychological well-being | .85 | .88 | |
| *Notes*. Reliability was computed by using McDonald’s Omega; R software and *psych* package were used | | | |

| Supplementary Table 6  *Social well-being scale: Scores’ Reliability* | | |  |
| --- | --- | --- | --- |
| Scale | China | Spain | |
| Social integration | .69 | .69 | |
| Social acceptance | .70 | .70 | |
| Social contribution | .70 | .71 | |
| Social updating | .71 | .72 | |
| Social coherence | .80 | .79 | |
| Social well-being | .71 | .70 | |
| *Notes*. Reliability was computed by using McDonald’s Omega ; R software and *psych* package were used | | | |

*Supplementary Material 2: Measures applied in this research (in Spanish)*

Con esta investigación queremos averiguar, si os sentís bien a nivel personal y social en España, así como conocer el nivel de implicación que tenéis con vuestros estudios de máster, y especialmente con la asignatura de literatura española. Nos interesa mucho saber si estudiar literatura española, tal y como lo hemos hecho en clase (de una forma dinámica y tratando de ver el mensaje y simbolismo de los textos), os ha impactado de alguna forma que va más allá de la memorización.

En otras palabras, queremos que valoréis vuestra experiencia con los textos y las obras literarias que habéis leído a lo largo del curso y hemos analizado en clase.

El cuestionario es completamente anónimo y se respetará escrupulosamente la Ley de Protección de Datos.

Por favor, COMPRUEBA QUE NO HAS DEJADO NINGUNA PREGUNTA SIN CONTESTAR.

**1. Sexo**:

Varón ………………………………...

Mujer ………………………………...

**2. Edad**:

______años

**3. ¿Eres hijo único?**

Sí ……………………………...

No ……………………………...

**4. ¿Tus padres tienen estudios universitarios?**

Sí ……………………………...

No ……………………………...

**5. El español:**

Es mi primera lengua extranjera……...

Es mi segunda lengua extranjera……...

**6. Visité Europa por primera vez:**

Sí……………………………….……...

No……...................................................

**7. ¿Por qué estudias en la Universidad?**

Por decisión propia…………………...

Por agradar a mi familia……………...

Por ambos motivos…………………...

Otros motivos………………………...

¿Cuáles?___________________________________________________________________________________________________________________________________________________________________________________________________________

**8. ¿Estudiar español en la universidad en China era tu primera opción de entre los estudios que querías realizar?**

Sí ……………………………...

No ……………………………...

**9. ¿Cuando estabas en China te interesaba España y su cultura?**

Sí ……………………………...

No ……………………………...

**¿Por qué?**

__________________________________________________________________________________________________________________________________________________________________________________________________________________

**10. Después de haber finalizado este curso, ¿sigues interesado en España y su cultura?**

Sí ……………………………...

No ……………………………...

**¿Por qué?**

__________________________________________________________________________________________________________________________________________________________________________________________________________________

**11. ¿Te arrepientes de haber venido a España a estudiar español?**

Sí ……………………………...

No ……………………………...

**¿Por qué?**

__________________________________________________________________________________________________________________________________________________________________________________________________________________

**12. ¿Crees que tener un máster en ELE por la UCM te va a garantizar un trabajo en China?**

Sí ……………………………...

No ……………………………...

**¿Por qué?**

__________________________________________________________________________________________________________________________________________________________________________________________________________________

**13. ¿Recomendarías a otros compañeros chinos estudiar literatura española de forma dinámica, tratando de ver y reflexionar sobre los mensajes de los textos, como se ha hecho en clase?**

Sí ……………………………...

No ……………………………...

**¿Por qué?**

__________________________________________________________________________________________________________________________________________________________________________________________________________________

**14. ¿Te han emocionado las explicaciones de literatura dadas en clase?**

Sí ……………………………...

No ……………………………...

**Si contestas SÍ, ¿Con qué obra literaria te has emocionado más? ¿Por qué?**

__________________________________________________________________________________________________________________________________________________________________________________________________________________

**15. ¿Qué es para ti ser feliz?**

__________________________________________________________________________________________________________________________________________________________________________________________________________________

**16. Cuándo estabas en China con tu familia, ¿consideras que eras feliz?**

Sí ……………………………...

No ……………………………...

**¿Por qué?**

__________________________________________________________________________________________________________________________________________________________________________________________________________________

**17. Ahora que estás estudiando en España, ¿consideras que eres feliz?**

Sí ……………………………...

No ……………………………...

**¿Por qué?**

__________________________________________________________________________________________________________________________________________________________________________________________________________________

**Escala de satisfacción temporal con la vida (SWLS-T)**

A continuación aparecen 5 afirmaciones con las que puedes estar de acuerdo o en desacuerdo. Utilizando la siguiente escala de 1 a 7, indica su acuerdo con cada una anotándolo a la izquierda de afirmación. Decide si te has sentido de esta forma cuando estudiabas español en **China** y también cuando estudias español en **España**. Por favor, responde a las preguntas abierta y sinceramente.

| Completamente en desacuerdo | En desacuerdo | Más bien en desacuerdo | Ni de acuerdo ni en desacuerdo | Más bien de acuerdo | De acuerdo | Completamente de acuerdo |
| --- | --- | --- | --- | --- | --- | --- |
| 1 | 2 | 3 | 4 | 5 | 6 | 7 |

| Cuando estudiaba en **CHINA** | |  | Cuando estudio en **ESPAÑA** | |
| --- | --- | --- | --- | --- |
| 1.En la mayoría de las cosas, mi vida estaba cerca de mi ideal |  |  | 1.En la mayoría de las cosas, mi vida está cerca de mi ideal |  |
| 2. Las condiciones de mi vida eran excelentes |  |  | 2. Las condiciones de mi vida son excelentes |  |
| 3. Estaba satisfecho con mi vida |  |  | 3. Estoy satisfecho con mi vida |  |
| 4. Hasta ahora, había conseguido las cosas que para mí son importantes |  |  | 4. Hasta ahora, he conseguido las cosas que para mí son importantes |  |
| 5. Pensaba que, si volviese a nacer, no cambiaría casi nada de mi vida. |  |  | 5. Pienso que, si volviese a nacer, no cambiaría casi nada de mi vida. |  |

**Cuestionario sobre actitudes y emociones sobre la literatura estudiada en clase**

Las siguientes preguntas se refieren a los sentimientos que has podido experimentar mientras estudiabas literatura española en la UCM. Si nunca te has sentido o has pensado así, contesta “0” (cero), y en caso contrario, indica cuántas veces te has sentido o has pensado así teniendo en cuenta el número que aparece en la siguiente escala de respuesta (1 a 6).

| Nunca | Casi nunca | Algunas veces | Regularmente | Bastantes veces | Casi siempre | Siempre |
| --- | --- | --- | --- | --- | --- | --- |
| 0 | 1 | 2 | 3 | 4 | 5 | 6 |

| 1. ¿Estudiar literatura española en la UCM ha fortalecido tu vocación como hispanista? |  |
| --- | --- |
| 2. ¿Has hablado positivamente de tu experiencia de estudiar literatura española en la UCM a tu familia y amigos de China? |  |
| 3. ¿Estudiar literatura española en la UCM te ha abierto la mente? |  |
| 4. ¿Estudiar literatura española en la UCM te ha hecho creer más en ti mismo? |  |
| 5. ¿Crees que estudiar literatura española en la UCM te ha ayudado o te ayudará a integrarte más en España? |  |
| 6. ¿Estudiar literatura española en la UCM te ha hecho plantearte preguntas sobre ti mismo? |  |
| 7. ¿Estudiar literatura española en la UCM te ha hecho plantearte preguntas sobre China, su historia y su sociedad? |  |
| 8. ¿Estudiar literatura española en la UCM te ha hecho plantearte preguntas sobre España, su historia y su sociedad? |  |
| 9. ¿Estudiar literatura española en la UCM te ha hecho plantearte preguntas sobre tu sistema de valores? |  |
| 10. ¿Crees que estudiar literatura española te ha hecho madurar intelectualmente? |  |
| 11. ¿Crees que estudiar literatura te ha servido para entender mejor la forma de pensar y la forma de ser de los españoles? |  |
| 12. ¿Crees que esta asignatura de literatura española te ayudará a ser mejor profesor en el futuro? |  |
| 13. ¿Estudiar literatura en la UCM te ha hecho cambiar alguna opinión que tenías respecto a algún tema? |  |
| 14. ¿Lograr entender, aunque sea con esfuerzo, los mensajes de los textos literarios te ha hecho sentirte orgulloso de ti mismo? |  |
| 15. Cuando vuelvas a China, ¿recordarás positivamente las clases de literatura española? |  |

**Encuesta de bienestar y contexto académico**

Las siguientes preguntas se refieren a los sentimientos de las personas en el contexto académico. Por favor, lee cuidadosamente cada pregunta y decida si se ha sentido de esta forma cuando estudiabas español en **China** y también cuando estudias español en **España**. Si nunca se ha sentido así conteste “0” (cero), y en caso contrario, indique cuántas veces se ha sentido así teniendo en cuenta el número que aparece en la siguiente escala de respuesta (de 1 a 6).

| Nunca | Casi nunca | Algunas veces | Regularmente | Bastantes veces | Casi siempre | Siempre |
| --- | --- | --- | --- | --- | --- | --- |
| 0 | 1 | 2 | 3 | 4 | 5 | 6 |

| Cuando estudiaba en **CHINA** | |  | Cuando estudio en **ESPAÑA** | |
| --- | --- | --- | --- | --- |
| 1. Mis tareas como estudiante me hacían sentir lleno de energía |  |  | 1. Mis tareas como estudiante me hacen sentir lleno de energía |  |
| 2. Me sentía fuerte y con vigor cuando estoy estudiando o voy a las clases de la universidad |  |  | 2. Me siento fuerte y con vigor cuando estoy estudiando o voy a las clases de la universidad |  |
| 3. Sentía entusiasmo por mis estudios de español |  |  | 3. Siento entusiasmo por mis estudios de español |  |
| 4. Olvido todo lo que pasaba alrededor de mi cuando estaba abstraído con mis estudios. |  |  | 4. Olvido todo lo que pasa alrededor de mi cuando estoy abstraído con mis estudios. |  |
| 5. Mis estudios me inspiraban cosas nuevas |  |  | 5. Mis estudios me inspiran cosas nuevas |  |
| 6. Cuando me levantaba por las mañanas me apetecía ir a clase o estudiar |  |  | 6. Cuando me levanto por las mañanas me apetece ir a clase o estudiar |  |
| 7. Era feliz cuando estaba haciendo tareas relacionadas con mis estudios |  |  | 7. Soy feliz cuando estoy haciendo tareas relacionadas con mis estudios |  |
| 8. Estaba orgulloso de haber escogido estudiar español |  |  | 8. Estoy orgulloso de haber escogido estudiar español |  |
| 9. Estaba inmerso en mis estudios |  |  | 9. Estoy inmerso en mis estudios |  |

**Experiencia estética/placer estético al leer una obra literaria**

Con esta escala queremos evaluar si en algún momento, mientras leías literatura en China o en España, has sentido que una obra literaria ha destacado por su **belleza**. La belleza se define como la “**Propiedad de las cosas que hace amarlas, infundiendo en nosotros deleite espiritual. Esta propiedad existe en la naturaleza y en las obras literarias y artísticas”**.

A continuación aparecen 10 afirmaciones con las que puedes estar de acuerdo o en desacuerdo. Utilizando la siguiente escala de 1 a 5, indica tu grado de acuerdo con cada una anotándolo a la derecha de cada afirmación. Decide si te has sentido de esta forma cuando has leído una **obra literaria** (incluyendo literatura china o en español, incluso en otra lengua) cuando estudiabas español en **China** y también cuando estudias español en **España**. Por favor, responde a las preguntas sinceramente.

| Muy diferente a mí | Algo diferente a mí | Neutro | Algo parecido a mí | Muy parecido a mí |
| --- | --- | --- | --- | --- |
| 1 | 2 | 3 | 4 | 5 |

| Cuando leía literatura en **CHINA** | |  | Cuando leo literatura **ESPAÑOLA** en **ESPAÑA** (por mi cuenta o en las clases de la UCM) | |
| --- | --- | --- | --- | --- |
| 1. Para mí era importante leer obras de gran belleza literaria |  |  | 1. Para mí es importante leer obras de gran belleza literaria |  |
| 2. La belleza de la literatura me emocionó |  |  | 2. La belleza de la literatura me emociona |  |
| 3. Experimentaba emociones profundas cuando leía obras clásicas de la literatura |  |  | 3. Experimento emociones profundas cuando leo obras clásicas de la literatura |  |
| 4. Veía la belleza en las obras literarias que otras personas no percibían |  |  | 4. Veo la belleza en las obras literarias que otras personas no perciben |  |
| 5. La belleza de una obra literaria me dejó sin palabras en muchas ocasiones |  |  | 5. La belleza de una obra literaria me ha dejado sin palabras en muchas ocasiones |  |
| 6. Era a menudo consciente de la belleza que rodea a una obra literaria |  |  | 6. Soy a menudo consciente de la belleza que rodea a una obra literaria |  |
| 7. Valoraba enormemente la mayoría de las obras literarias que leía |  |  | 7. Valoro enormemente la mayoría de las obras literarias que he leído |  |
| 8. Me asombraban los pequeños detalles de las obras literarias que los demás no podrían apreciar |  |  | 8. Me asombran los pequeños detalles de las obras literarias que los demás no podrían apreciar |  |
| 9. Con frecuencia sentía muchas ganas de disfrutar de una buena obra literaria, como por ejemplo, un clásico, un poema o una obra de teatro |  |  | 9. Con frecuencia siento muchas ganas de disfrutar de una buena obra literaria, como por ejemplo, un clásico, un poema o una obra de teatro |  |
| 10. Leí algo hermoso durante el tiempo que era estudiante en China |  |  | 10. He leído algo hermoso durante el tiempo que llevo estudiando literatura española en España. |  |

**Escala de bienestar psicológico**

A continuación aparecen 29 afirmaciones con las que puedes estar de acuerdo o en desacuerdo. Utilizando la siguiente escala de 1 a 6, indica tu grado de acuerdo con cada una anotándolo a la derecha de la afirmación. Decide si te has sentido de esta forma cuando estudiabas español en China y también cuando estudias español en España. Por favor, responde a las preguntas sinceramente.

| Completamente en desacuerdo | En desacuerdo | Parcialmente en desacuerdo | Parcialmente de acuerdo | De acuerdo | Completamente de acuerdo |
| --- | --- | --- | --- | --- | --- |
| 1 | 2 | 3 | 4 | 5 | 6 |

| Cuando estudiaba en **CHINA** | |  | Cuando estudio en **ESPAÑA** | |
| --- | --- | --- | --- | --- |
| 1. Repasaba la historia de mi vida y estaba contento con cómo resultaron las cosas |  |  | 1. Cuando repaso la historia de mi vida estoy contento con cómo han resultado las cosas |  |
| 2. A menudo me sentía solo porque tenía pocos amigos íntimos con quienes compartir mis preocupaciones |  |  | 2. A menudo me siento solo porque tengo pocos amigos íntimos con quienes compartir mis preocupaciones |  |
| 3. Me preocupaba cómo otra gente evaluaba las elecciones que he hecho en mi vida |  |  | 3. Me preocupa cómo otra gente evalúa las elecciones que he hecho en mi vida |  |
| 4. Me resultaba difícil dirigir mi vida hacia un camino que me causara satisfacción |  |  | 4. Me resulta difícil dirigir mi vida hacia un camino que me cause satisfacción |  |
| 5. Disfrutaba haciendo planes para el futuro y trabajar para hacerlos realidad |  |  | 5. Disfruto haciendo planes para el futuro y trabajar para hacerlos realidad |  |
| 6. En general, me sentía seguro y positivo conmigo mismo |  |  | 6. En general, me siento seguro y positivo conmigo mismo |  |
| 7. No tenía muchas personas que quisieran escucharme cuando necesitaba hablar |  |  | 7. No tengo muchas personas que quieran escucharme cuando necesito hablar |  |
| 8. Tendía a preocuparme sobre lo que otra gente piensa de mí |  |  | 8. Tiendo a preocuparme sobre lo que otra gente piensa de mí |  |
| 9. Había sido capaz de construir un hogar y un modo de vida a mi gusto |  |  | 9. He sido capaz de construir un hogar y un modo de vida a mi gusto |  |
| 10. Era una persona activa al realizar los proyectos que propuse para mí mismo |  |  | 10. Soy una persona activa al realizar los proyectos que propuse para mí mismo |  |
| 11. Sentía que mis amistades me aportan muchas cosas |  |  | 11. Siento que mis amistades me aportan muchas cosas |  |
| 12. Tendía a estar influenciado por la gente con fuertes convicciones |  |  | 12. Tiendo a estar influenciado por la gente con fuertes convicciones |  |
| 13. En general, sentía que era responsable de la situación en la que vivía |  |  | 13. En general, siento que soy responsable de la situación en la que vivo |  |
| 14. Me sentía bien cuando pensaba en lo que había en el pasado y lo que esperaba hacer en el futuro |  |  | 14. Me siento bien cuando pienso en lo que he hecho en el pasado y lo que espero hacer en el futuro |  |
| 15. Mis objetivos en la vida habían sido más una fuente de satisfacción que de frustración para mí |  |  | 15. Mis objetivos en la vida han sido más una fuente de satisfacción que de frustración para mí |  |
| 16. Me gustaban la mayor parte de los aspectos de mi personalidad |  |  | 16. Me gusta la mayor parte de los aspectos de mi personalidad |  |
| 17. Me parecía que la mayor parte de las personas tenían más amigos que yo |  |  | 17. Me parece que la mayor parte de las personas tienen más amigos que yo |  |
| 18. Tenía confianza en mis opiniones incluso si eran contrarias al consenso general |  |  | 18. Tengo confianza en mis opiniones incluso si son contrarias al consenso general |  |
| 19. Las demandas de la vida diaria a menudo me deprimían |  |  | 19. Las demandas de la vida diaria a menudo me deprimen |  |
| 20. Tenía clara la dirección y el objetivo de mi vida |  |  | 20. Tengo clara la dirección y el objetivo de mi vida |  |
| 21. En general, con el tiempo sentía que seguía aprendiendo más sobre mí mismo |  |  | 21. En general, con el tiempo siento que sigo aprendiendo más sobre mí mismo |  |
| 22. No experimenté muchas relaciones cercanas y de confianza |  |  | 22. No he experimentado muchas relaciones cercanas y de confianza |  |
| 23. Era difícil para mí expresar mis propias opiniones en asuntos polémicos |  |  | 23. Es difícil para mí expresar mis propias opiniones en asuntos polémicos |  |
| 24. En su mayor parte, me sentía orgulloso de quién soy y la vida que llevaba |  |  | 24. En su mayor parte, me siento orgulloso de quién soy y la vida que llevo |  |
| 25. Sabía que podía confiar en mis amigos, y ellos sabían que podían confiar en mí |  |  | 25. Sé que puedo confiar en mis amigos, y ellos saben que pueden confiar en mí |  |
| 26. Cuando pensaba en ello, realmente con los años no había mejorado mucho como persona |  |  | 26. Cuando pienso en ello, realmente con los años no he mejorado mucho como persona |  |
| 27. Tenía la sensación de que con el tiempo me había desarrollado mucho como persona. |  |  | 27. Tengo la sensación de que con el tiempo me he desarrollado mucho como persona. |  |
| 28. Para mí, la vida era un proceso continuo de estudio, cambio y crecimiento |  |  | 28. Para mí, la vida ha sido un proceso continuo de estudio, cambio y crecimiento |  |
| 29. Si me sentí infeliz con mi situación de vida, di los pasos más eficaces para cambiarla |  |  | 29. Si me sintiera infeliz con mi situación de vida, daría los pasos más eficaces para cambiarla |  |

**Escala de bienestar social**

A continuación aparecen 25 afirmaciones con las que puedes estar de acuerdo o en desacuerdo. Utilizando la siguiente escala de 1 a 6, indica tu grado de acuerdo con cada una anotándolo a la derecha de la afirmación. Decide si te has sentido de esta forma cuando estudiabas español en China y también cuando estudias español en España. Por favor, responde a las preguntas sinceramente.

| Completamente en desacuerdo | En desacuerdo | Parcialmente en desacuerdo | Parcialmente de acuerdo | De acuerdo | Completamente de acuerdo |
| --- | --- | --- | --- | --- | --- |
| 1 | 2 | 3 | 4 | 5 | 6 |

| Cuando estudiaba en **CHINA** | |  | Cuando estudio en **ESPAÑA** | |
| --- | --- | --- | --- | --- |
| 1. Sentía que era una parte importante de mi comunidad |  |  | 1. Siento que soy una parte importante de mi comunidad |  |
| 2. Creía que la gente me valoraba como persona |  |  | 2. Creo que la gente me valora como persona |  |
| 3. Si tenía algo que decir, creía que la mayoría de la gente me escucharía |  |  | 3. Si tengo algo que decir, creo que la mayoría de la gente me escucharía |  |
| 4. Me sentía cercano a otra gente |  |  | 4. Me siento cercano a otra gente |  |
| 5. Si hubiera tenido algo que decir, pensaba que la gente no se lo tomaría en serio |  |  | 5. Si tuviera algo que decir, pienso que la gente no se lo tomaría en serio |  |
| 6. Creía que la gente no es de fiar |  |  | 6. Creo que la gente no es de fiar |  |
| 7. Creía que las personas sólo pensaban en sí mismas |  |  | 7. Creo que las personas sólo piensan en sí mismas |  |
| 8. Creía que no se debía confiar en la gente |  |  | 8. Creo que no se debe confiar en la gente |  |
| 9. Creía que la gente era egoísta |  |  | 9. Creo que la gente es egoísta |  |
| 10. Pensaba que la gente es cada vez más deshonesta |  |  | 10. Hoy en día, la gente es cada vez más deshonesta |  |
| 11. Las personas no se preocupaban de los problemas de otros |  |  | 11. Las personas no se preocupan de los problemas de otros |  |
| 12. Creía que puedo aportar algo al mundo |  |  | 12. Creo que puedo aportar algo al mundo |  |
| 13. No tenía nada importante que ofrecer a la sociedad |  |  | 13. No tengo nada importante que ofrecer a la sociedad |  |
| 14. Mis actividades diarias no aportaban nada que valiera la pena a la sociedad |  |  | 14. Mis actividades diarias no aportan nada que valga la pena a la sociedad |  |
| 15. No tenía ni el tiempo ni la energía para aportar algo a la sociedad |  |  | 15. No tengo ni el tiempo ni la energía para aportar algo a la sociedad |  |
| 16. Pensaba que lo que hacía era importante para la sociedad |  |  | 16. Pienso que lo que hago es importante para la sociedad |  |
| 17. Para mi el progreso social era algo que no existía |  |  | 17. Para mi el progreso social es algo que no existe |  |
| 18. La sociedad no ofrecía alicientes para gente como yo |  |  | 18. La sociedad no ofrece alicientes para gente como yo |  |
| 19. Veía que la sociedad estaba en continuo desarrollo |  |  | 19. Veo que la sociedad está en continuo desarrollo |  |
| 20. No creía que instituciones como la universidad mejorasen mi vida |  |  | 20. No creo que instituciones como la universidad mejoren mi vida |  |
| 21. La sociedad ya no progresaba |  |  | 21. La sociedad ya no progresa |  |
| 22. No entendía lo que estaba pasando en el mundo |  |  | 22. No entiendo lo que está pasando en el mundo |  |
| 23. El mundo era demasiado complejo para mi |  |  | 23. El mundo es demasiado complejo para mi |  |
| 24. No merecía la pena esforzarse en intentar comprender el mundo en el que vivía |  |  | 24. No merece la pena esforzarse en intentar comprender el mundo en el que vivo |  |
| 25. Muchas culturas eran tan extrañas que no podía comprenderlas |  |  | 25. Muchas culturas son tan extrañas que no puedo comprenderlas |  |
